# Supplementary material for: Shade-induced RTFL/DVL peptides negatively regulate the shade response by directly interacting with BSKs in Arabidopsis
Source: PubMed Central journal article supplement (PMC10613268; doi:10.1038/s41467-023-42618-3), 2023-10-28
Supplement: 41467_2023_42618_MOESM1_ESM.pdf [file 41467_2023_42618_MOESM1_ESM.pdf]

## Supplementary Information

### **Shade-induced RTFL/DVL peptides negatively regulate the shade response by directly interacting with BSKs in Arabidopsis**

Sha Huang<sup>1</sup>, Yu Ma<sup>1</sup>, Yitian Xu<sup>1</sup>, Pengfei Lu<sup>1</sup>, Jie Yang<sup>2</sup>, Yu Xie<sup>1</sup>, Jianhua Gan<sup>2</sup>,  
Lin Li<sup>1,\*</sup>

<sup>1</sup>State Key Laboratory of Genetic Engineering, Institute of Plants Biology, School of Life Sciences, Fudan University, Shanghai 200438, China

<sup>2</sup>Shanghai Public Health Clinical Center, State Key Laboratory of Genetic Engineering, Department of Physiology and Biophysics, School of Life Sciences, Fudan University, Shanghai 200438, China

\*Corresponding Author Email: [linli@fudan.edu.cn](mailto:linli@fudan.edu.cn)

The following Supplementary Information is available for this article:

Supplementary Fig. 1- Supplementary Fig.7

Supplementary Table 1

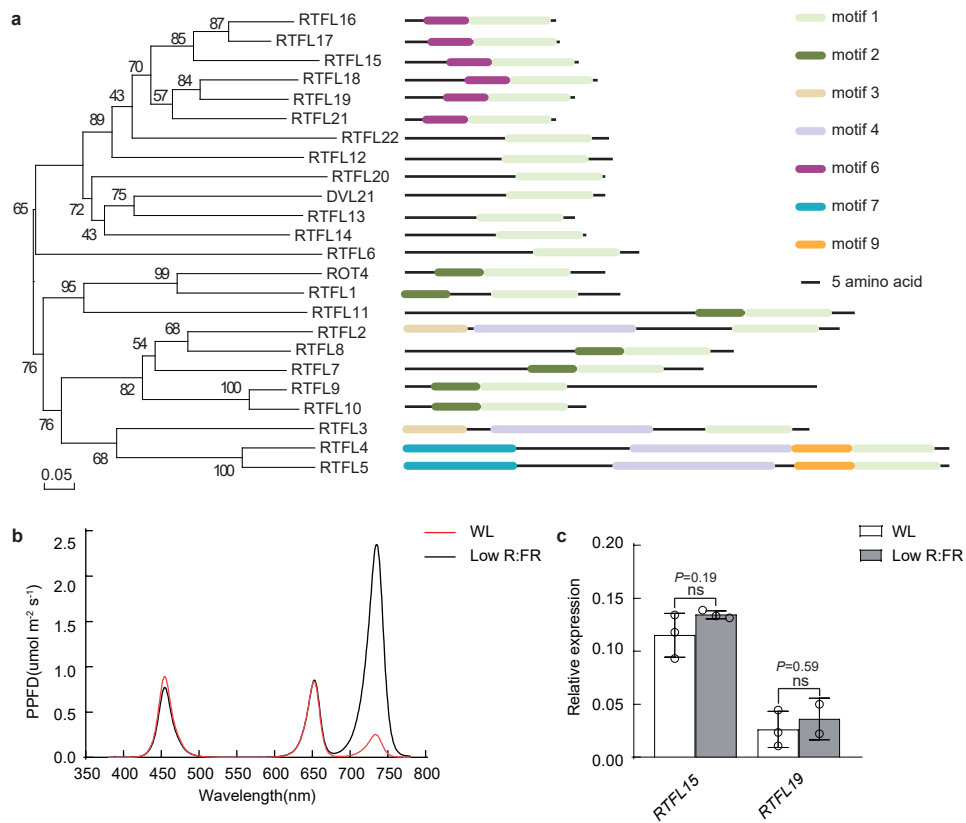

**Supplementary Fig. 1 | Low R:FR light significantly regulates the transcription of at least five *RTFL/DVL* genes.** **a**, Phylogenetic analysis of twenty-four *Arabidopsis* RTFL peptides. Evolutionary analysis was conducted in DNAMAN with a bootstrap of 1000. Motifs refer to those reported by Guo *et al.*, 2015<sup>1</sup>. **b**, Light spectral composition of white light and low R:FR treatments used in this study. **c**, The relative expression levels of *RTFL15* and *RTFL19* in seedlings grown under WL and low R:FR conditions. Seedlings grown for 5 days under white light were transferred to low R:FR or continual white light exposure for 1 h. The expression levels of *RTFLs* were normalized against the expression of the reference gene *AT2G39960*. Data are presented as mean values  $\pm$  SD ( $n=3$ ,  $n$  refers to biological replicates). The asterisks indicate significant differences to WL, respectively (Multiple *t* test: False Discovery Rate approach, ns indicates no significance). Source data are provided as a Source Data file.

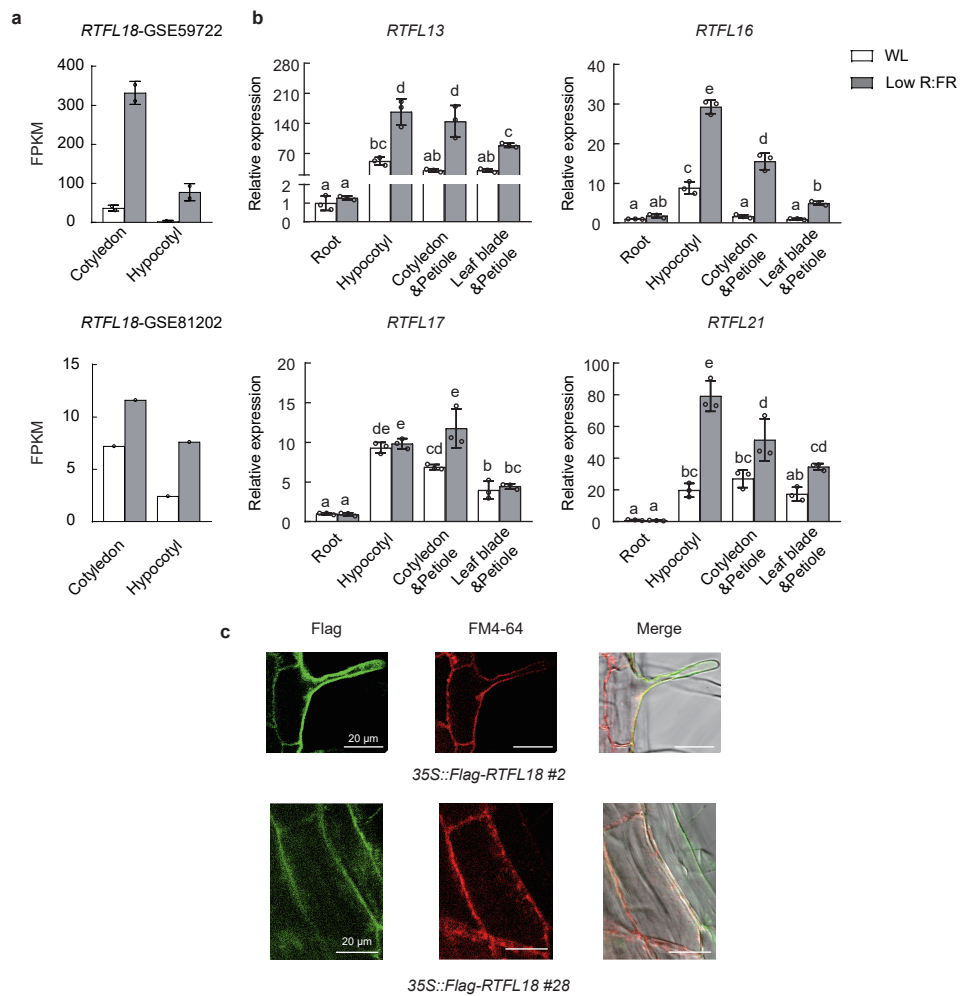

**Supplementary Fig. 2 | Transcription levels of *RTFLs* in different tissue and subcellular localization of Flag-*RTFL18*.** **a**, Transcription levels of *RTFL18* in cotyledons and hypocotyls in the GSE59722 and GSE81202 datasets. **b**, The relative expression of *RTFL13/16/17/21* in different tissues under WL and low R:FR conditions was measured by RT-qPCR. Seedlings grown for 10 days with white light were transferred to low R:FR conditions or continually exposed to white light for 1 h, and the different tissues were separated. The expression levels of *RTFL13/16/17/21* were normalized against the expression of the reference gene *AT2G39960*, and the expression in the roots under WL was standardized to be “1”. Data are presented as mean values  $\pm$  SD ( $n=3$ ,  $n$  refers to biological replicates). Letters indicate significant differences between mean values (one-way ANOVA: Tukey’s multiple comparisons test,  $P < 0.05$ ), and groups with the same letters are not significantly different. **c**, Subcellular localization of Flag-*RTFL18* was measured by immunolocalization assay. Seedlings were grown under white light for 6 days. Flag-*RTFL18* (green) was labeled by immunolocalization using anti-Flag antibodies and observed with a confocal laser scanning microscope. The membrane was stained with FM4-64 (red). Flag, Flag signal; FM4-64, FM4-64 staining; Merge, merged image of the Flag signal with the FM4-64 signal in a bright field. Scale bars represent 20  $\mu$ m. Source data are provided as a Source Data file.

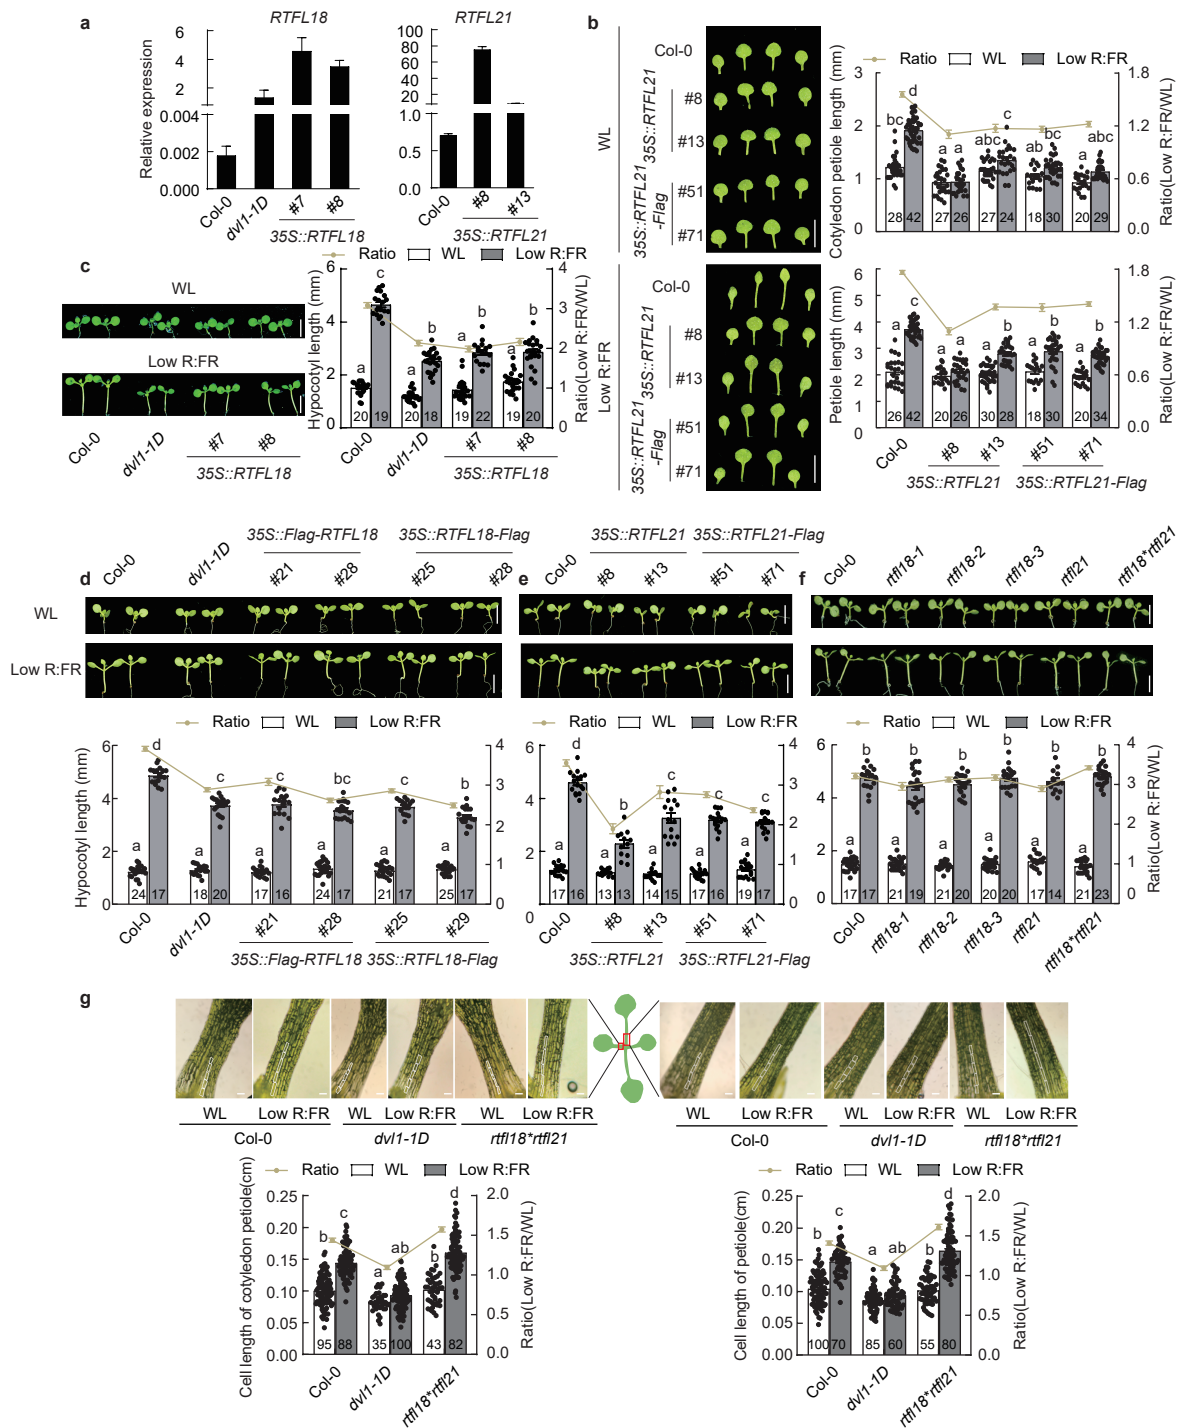

**Supplementary Fig. 3 | Expression of *RTFL18* and phenotype of *RTFL18*-related mutants.** **a**, The relative expressions of *RTFL18* or *RTFL21* in the Col-0, *dv1-1D*, *35S::RTFL18* (#7, #8) lines and *35S::RTFL21* (#8, #13) lines were measured by RT-qPCR. Seedlings were grown under white light for 5 days. The expression levels of *RTFL18* were normalized against the expression of the reference gene *AT2G39960*. Data are presented as mean values  $\pm$  SD ( $n=3$ ,  $n$  refers to biological replicates). **b**, The petiole lengths of the cotyledons and the first and second leaves in Col-0, *35S::RTFL21* (#8, #13), and *35S::RTFL18-Flag* (#51, #71) lines grown under white light (WL) and low R:FR conditions were measured. **c**, The hypocotyl lengths of the Col-0, *dv1-1D*, and *35S::RTFL18* (#7, #8) lines grown under white light (WL) and low R:FR conditions. **d**, The hypocotyl lengths of the Col-0, *dv1-1D*, *35S::Flag-RTFL18* (#21, #28), and *35S::RTFL18-Flag* (#25, #29) lines grown under WL and low R:FR conditions. **e**, The hypocotyl lengths of the Col-0, *35S::RTFL21*, and *35S::RTFL18-Flag* lines grown under white light (WL) and low R:FR conditions. **f**, The hypocotyl lengths of the Col-0, *rtfl18-1*, *rtfl18-2*, *rtfl18-3*, *rtfl21*, and *rtfl18\*rtfl21* lines grown under WL and low R:FR conditions. **g**, The cell lengths of the cotyledon petiole and the first/second petiole of the Col-0, *dv1-1D*, and *rtfl18\*rtfl21* lines grown under WL and low R:FR conditions. Seedlings grown for 3 days under white light were transferred to low R:FR conditions or continued to be grown under white light for 8 days.

The numbers in the bar charts represent  $n$  of each sample. Data are presented as mean values  $\pm$  SEM. Letters in **b**, **c**, **d**, **e**, **f**, and **g** indicate significant differences between mean values (two-way ANOVA: Tukey's multiple comparisons test,  $P < 0.01$ ), and groups with the same letters are not significantly different. Scale bars represent 5 mm (**b**, **c**, **d**, **e**, **f**) and 100  $\mu$ m (**g**). Source data are provided as a Source Data file.



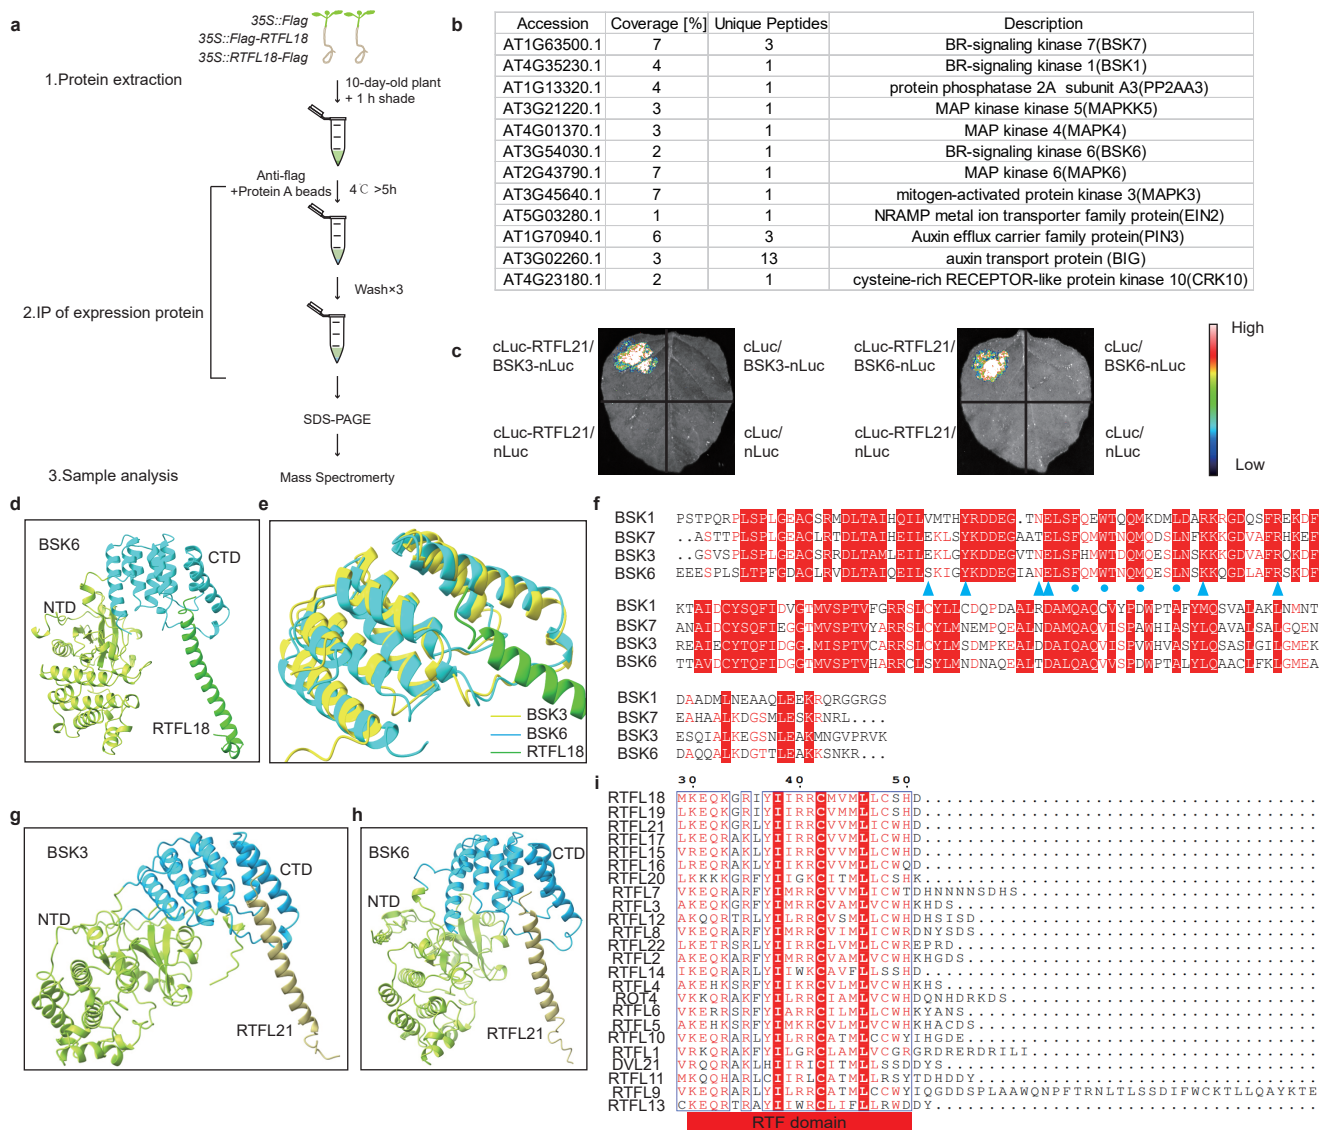

**Supplementary Fig. 4 | RTFLs interact with BSK3/6.** **a**, Schematic diagram of IP-MS. Seedlings grown for 10 days under white light were transferred to low R:FR and grown for 1 h. Total protein was extracted from *35S::Flag*, *35S::Flag-RTFL18*, and *35S::RTFL18-Flag* seedlings. **b**, Candidate proteins interacting with RTFLs as determined by MS. **c**, Interactions between RTFL21 and BSK3/BSK6 were detected by luciferase complementary imaging (LCI). The C-terminus of luciferase was fused to RTFL21, and the N-terminus of luciferase was fused to BSK3/BSK6. The constructs were cotransformed into *N. benthamiana* leaves. The luciferase signals were observed 60 h after infiltration. **d**, The BSK6/RTFL18 complex was predicted by AlphaFold-Multimer. The N-terminal domain (NTD) and C-terminal domain (CTD) of BSK6 are green yellow and cyan, respectively. RTFL18 is green. **e**, Superposition of the BSK3/RTFL18 and BSK6/RTFL18 complexes was predicted by AlphaFold-Multimer. The CTD domains of BSK3 and BSK6 are yellow and cyan, respectively. For clarity, only one RTFL18 is shown. **f**, Sequence alignment of the CTD domains of BSKs was conducted with GeneDoc. Conserved residues are highlighted. The residues involved in RTFL18 interactions are denoted with triangles (for H-bonds or electrostatic interactions) or dots (for hydrophobic interactions). **g**, The BSK3/RTFL21 complex was predicted by AlphaFold-Multimer. The N-terminal domain (NTD) and C-terminal domain (CTD) of BSK3 are green yellow and cyan, respectively. RTFL21 is yellow. **h**, The BSK6/RTFL21 complex was predicted by AlphaFold-Multimer. The N-terminal domain (NTD) and C-terminal domain (CTD) of BSK6 are green yellow and cyan, respectively. RTFL21 is yellow. **i**, Sequence alignment of the RTF domains in RTFL peptides was conducted with GeneDoc. Conserved residues are highlighted. The RTF domain refers to that in a report by Guo *et al.*, 2015<sup>1</sup>.

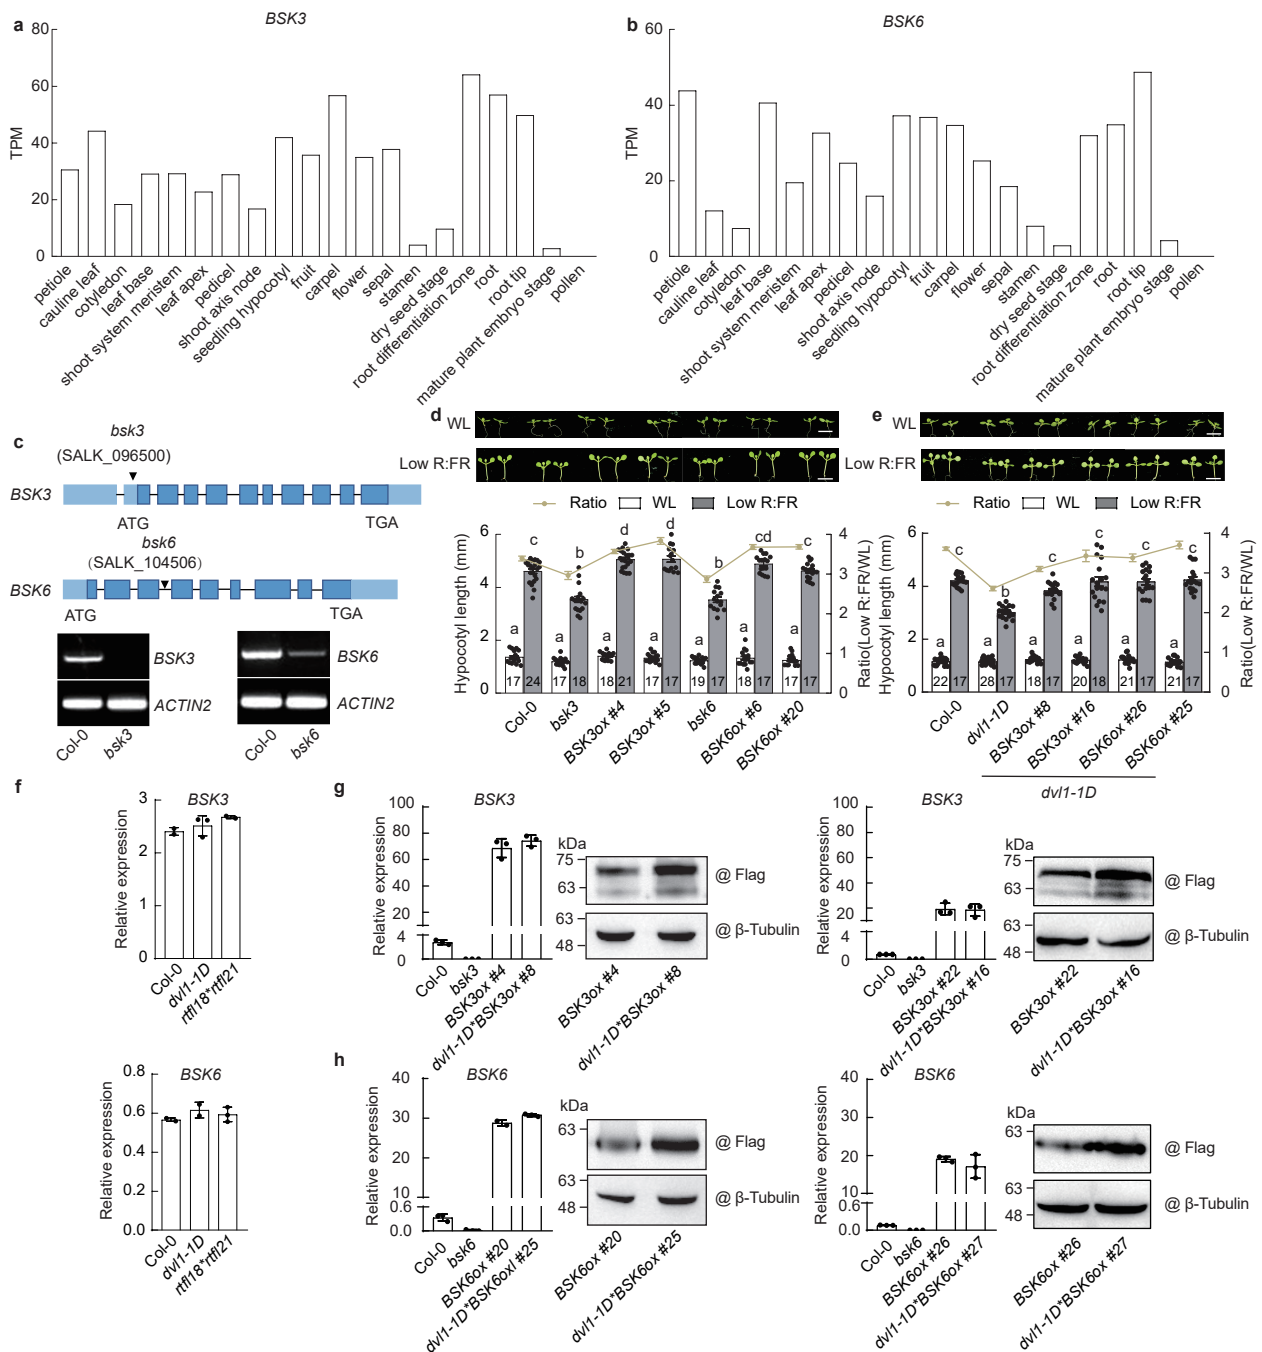

**Supplementary Fig. 5 | RTFL18 represses BSK3/6-mediated BR signaling.** **a-b**, The expressions of *BSK3* and *BSK6* in different tissues. Data were obtained from [www.proteomicsdb.org](http://www.proteomicsdb.org). **c**, Schematic diagrams of *bsk3* and *bsk6* mutants. Light blue boxes represent the 5' or 3' UTR. Dark blue boxes represent exons. Lines represent introns. The expression levels of *BSK3* and *BSK6* in Col-0, *bsk3*, and *bsk6* lines were measured by RT-PCR. Seedlings were grown for 5 days under white light. *ACTIN2* was used as the internal control. **d**, The hypocotyl lengths of the Col-0, *bsk3*, *bsk6*, *BSK3ox*, and *BSK6ox* lines grown under WL and low R:FR conditions. **e**, The hypocotyl lengths of the Col-0, *dvl1-1D*, *dvl1-1D\*BSK3ox*, and *dvl1-1D\*BSK6ox* lines grown under WL and low R:FR conditions. **f**, The relative expression levels of *BSK3* and *BSK6* in the Col-0, *dvl1-1D*, and *rtfl18\*rtfl21* lines were measured by RT-qPCR. **g-h**, The expression and protein levels of *BSK3* and *BSK6* in *BSK*-overexpressing seedlings were measured by RT-qPCR and western blotting. The left bar charts represent the relative expression levels of *BSK3/6* in Col-0, *bsk3*, *BSK3ox* and *dvl1-1D\*BSK3ox*, or Col-0, *bsk6*, *BSK6ox* and *dvl1-1D\*BSK6ox*. The right images represent the protein levels of *BSK3ox* and *dvl1-1D\*BSK3ox*, or *BSK6ox* and *dvl1-1D\*BSK6ox*. In **d** and **e**, the numbers in the bar charts represent n of each sample. Data are presented as mean values  $\pm$  SEM. Letters indicate significant differences between mean values (two-way ANOVA: Tukey's multiple comparisons test,  $P < 0.01$ ), and groups with the same letters are not significantly different. Scale bars represent 5 mm. In **f**, **g**, and **h**, seedlings were grown under white light for 5 days. The expression levels of *BSKs* were normalized against the expression of the reference gene *AT2G39960*. Data are presented as mean values  $\pm$  SD. In **g** and **h**,  $\beta$ -tubulin was used as the internal control and each experiment was repeated three times with similar results. Source data are provided as a Source Data file.

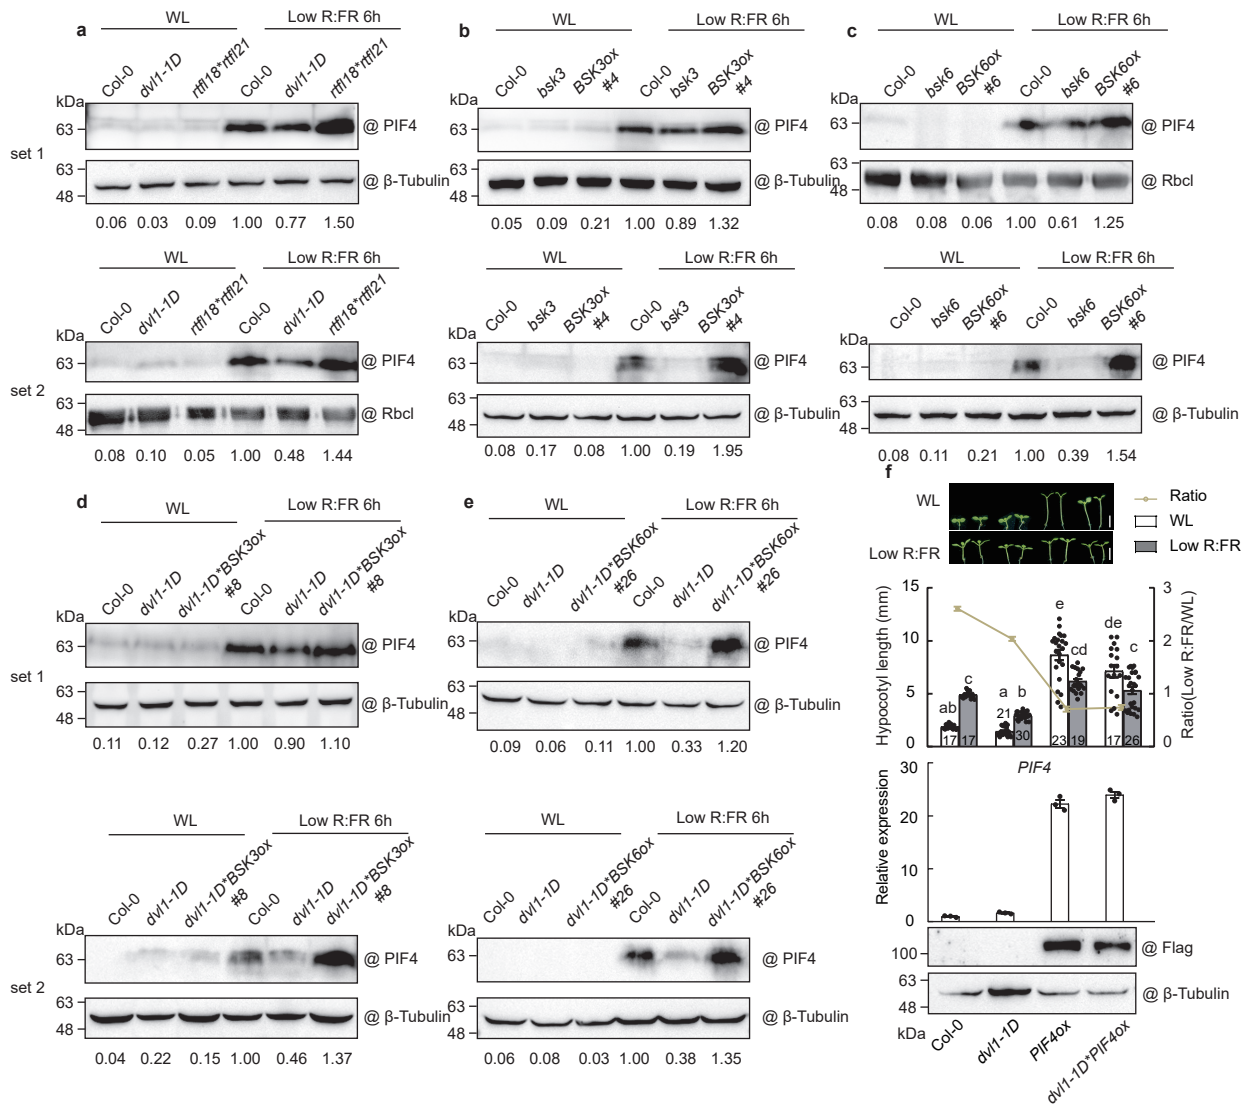

**Supplementary Fig. 6 | RTFL18 antagonizes the stabilization of PIF4 under low R:FR conditions.** **a**, The PIF4 protein levels in Col-0, *dvl1-1D*, and *rtfl18\*rtfl21* lines grown under white light (WL) and low R:FR conditions. **b-c**, The PIF4 protein levels in the Col-0, *bsk3*, *BSK3ox #4*, *bsk6*, and *BSK6ox #6* lines under WL and low R:FR conditions. **d-e**, The PIF4 protein levels in the Col-0, *dvl1-1D*, *dvl1-1D\*BSK3ox #8*, and *dvl1-1D\*BSK6ox #26* lines under WL and low R:FR conditions. **f**, The hypocotyl lengths in the Col-0, *dvl1-1D*, *PIF4ox*, and *dvl1-1D\*PIF4ox* lines grown under WL and low R:FR conditions. The numbers in the bar charts represent n of each sample. Data are presented as mean values  $\pm$  SEM. Letters indicate significant differences between mean values (two-way ANOVA: Tukey's multiple comparisons test,  $P < 0.01$ ), and groups with the same letters are not significantly different. Scale bars represent 5 mm. The middle panel bar charts represent the relative expression levels of *PIF4* in Col-0, *dvl1-1D*, *PIF4ox*, and *dvl1-1D\*PIF4ox*. Seedlings were grown under white light for 5 days. The expression levels of *PIF4* were normalized against the expression of the reference gene *AT2G39960*. The expression levels of *PIF4* in Col-0 were standardized as "1". Data are presented as mean values  $\pm$  SD. ( $n=3$ , n refers to biological replicates). The bottom panel represent the protein level of PIF4-Flag (*35S::PIF4-Flash*, 9×Myc-6×His-3×Flag) in Col-0, *dvl1-1D*, *PIF4ox*, and *dvl1-1D\*PIF4ox*. Western blots were probed with an anti-Flag antibody.  $\beta$ -tubulin was used as the internal control.

In **a**, **b**, **c**, **d**, and **e**, the PIF4 protein levels were normalized to  $\beta$ -tubulin/ Rbcl. The PIF4 protein levels of Col-0 under low R:FR were set as 1. Western blots were probed with an anti-PIF4 antibody. The levels of  $\beta$ -tubulin/ Rbcl indicate the loading concentration. In **a-e**, each experiment was repeated three times with similar results. Source data are provided as a Source Data file.

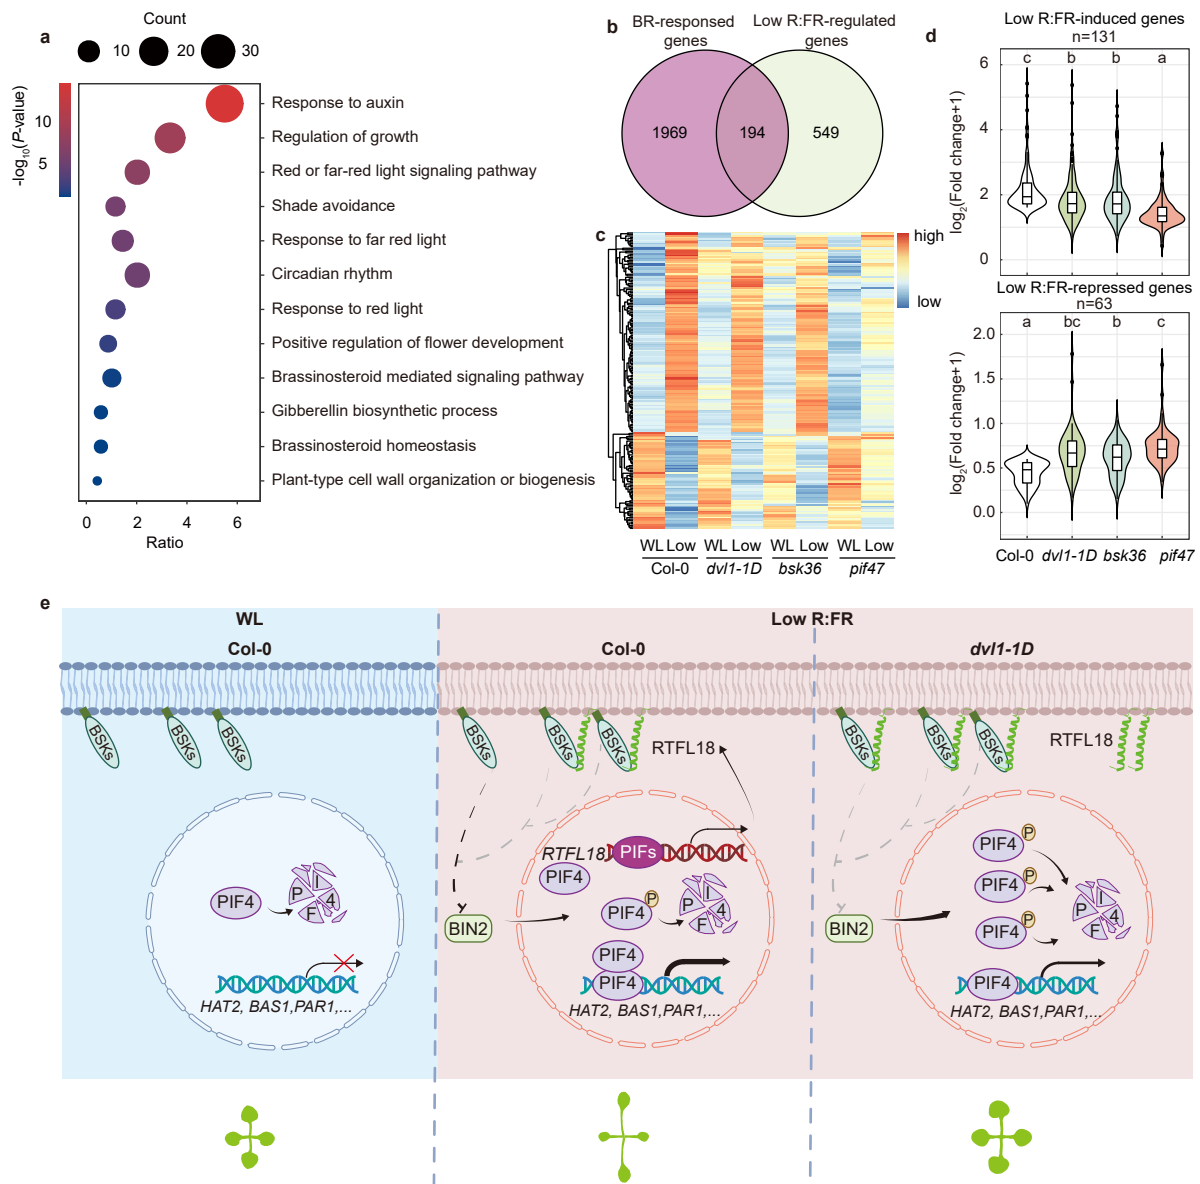

**Supplementary Fig. 7 | RTFL18 regulates the expression of BR-responsive genes and a working model of RTFL18.** **a**, Gene Ontology (GO) analysis of 743 low R:FR-regulated genes. The size of each point represents the number of genes, and the color represents the  $P$  value, Fisher's one-tailed test ( $P < 0.05$ ). **b**, Venn diagram representing 194 overlapping genes between low R:FR-regulated genes and BR-responsive genes. **c**, Heatmap showing the transcript levels of 194 overlapping genes in Col-0, *dv1-1D*, *bsk36*, and *pif47* under white light (WL) and low R:FR conditions. Red, yellow and blue rows indicate RNA expression at high, medium and low levels, respectively. **d**, Boxplot representing the fold changes of 194 BR-responsive genes in Col-0, *dv1-1D*, *bsk36*, and *pif47*, which were determined by comparing the transcript levels between WL and low R:FR conditions. Boxplots show the median (horizontal line), second to third quartiles (box), and whiskers extend to a maximum of 1.5× interquartile range beyond the box. Letters indicate significant differences between mean values (one-way ANOVA: Tukey's multiple comparisons test,  $P < 0.01$ ), and groups with the same letters are not significantly different. **e**, Proposed working model for the RTFL18-BSK3-PIF4 pathway. Under low R:FR conditions, PIF4 accumulates and regulates the expression of low R:FR-responsive genes, including in *RTFL18*. The polypeptide RTFL18 can interact with BSKs on the cell membrane to negatively regulate BR signaling and prevent an excessive shade avoidance response. In *dv1-1D*, large amounts of RTFL18 further promote the degradation of PIF4 and suppress low R:FR-induced elongation. Source data are provided as a Source Data file.

## References

1. Guo P, Yoshimura A, Ishikawa N, Yamaguchi T, Guo Y, Tsukaya H. Comparative analysis of the RTFL peptide family on the control of plant organogenesis. *J. Plant Res.* 128, 497-510 (2015).

Supplementary Table 1. Primers used in this study.

|                     | note                                     | Primer sequence                                                                                                                                |                           |
|---------------------|------------------------------------------|------------------------------------------------------------------------------------------------------------------------------------------------|---------------------------|
| qRT-PCR             | <i>RTFL13</i> -qPCR-F                    | ATGAAGATGTCCGAGAGACGAGTTG                                                                                                                      |                           |
|                     | <i>RTFL13</i> -qPCR-R                    | TCAATAGTCATCCCACCGTAACAAG                                                                                                                      |                           |
|                     | <i>RTFL15</i> -qPCR-F                    | ATGAAGACGACCGGTTTCGAGTGT                                                                                                                       |                           |
|                     | <i>RTFL15</i> -qPCR-R                    | TTAGTCATGCCAACAAAGAAGCAT                                                                                                                       |                           |
|                     | <i>RTFL16</i> -qPCR-F                    | ATGGGAGTTTTGAAGAGAAGAGTAT                                                                                                                      |                           |
|                     | <i>RTFL16</i> -qPCR-R                    | TCAATCTTGCCAACATAGGAGCAT                                                                                                                       |                           |
|                     | <i>RTFL17</i> -qPCR-F                    | ATGAAGATGGGAGGTTCAAAGAG                                                                                                                        |                           |
|                     | <i>RTFL17</i> -qPCR-R                    | TCAATCGTGCCAACAAAGAAGCATG                                                                                                                      |                           |
|                     | <i>RTFL18</i> -qPCR-F                    | ATGGAAATGAAGAGGGTCATGATG                                                                                                                       |                           |
|                     | <i>RTFL18</i> -qPCR-R                    | TCAATCATGCGAACAAAGGAGCATG                                                                                                                      |                           |
|                     | <i>RTFL19</i> -qPCR-F                    | ATGGAAAGCATCATGAGCTTGAAGA                                                                                                                      |                           |
|                     | <i>RTFL19</i> -qPCR-R                    | TTAATCATGCGAACAAAGGAGCATC                                                                                                                      |                           |
|                     | <i>RTFL21</i> -qPCR-F                    | ATGAAAGGTACCAAGAAGAAGACGC                                                                                                                      |                           |
|                     | <i>RTFL21</i> -qPCR-R                    | TTAGTCATGCCAACAAATGAGCATG                                                                                                                      |                           |
|                     | <i>BSK3</i> -qPCR-F                      | GGAGGAATGATCTCTCCAACAGTGTGTG                                                                                                                   |                           |
|                     | <i>BSK3</i> -qPCR-R                      | CTTCTCCATTCCAGGATACCAAGGG                                                                                                                      |                           |
|                     | <i>BSK6</i> -qPCR-F                      | GGAACAATGGTGTCCACCAACAGTACACG                                                                                                                  |                           |
|                     | <i>BSK6</i> -qPCR-R                      | GCATCGGCTTCCATACCCAGCTTG                                                                                                                       |                           |
|                     | <i>PAR1</i> -qPCR-F                      | GTTTCGAGCGCAGAACCAAAC                                                                                                                          |                           |
|                     | <i>PAR1</i> -qPCR-R                      | TGCTTCTTCTCGGTCTTCACGTA                                                                                                                        |                           |
|                     | <i>HAT2</i> -qPCR-F                      | ATGAAGAAGAAGACGGGGGCGAAA                                                                                                                       |                           |
|                     | <i>HAT2</i> -qPCR-R                      | ACACTTCCACTTGTCTTGCCGTC                                                                                                                        |                           |
|                     | <i>BAS1</i> -qPCR-F                      | AATCCAGCTCGGTTTGCCGGATG                                                                                                                        |                           |
|                     | <i>BAS1</i> -qPCR-R                      | AGGCCAAACGGTATGAAGCCAAC                                                                                                                        |                           |
|                     | <i>AT2G39960</i> -F                      | CCATCGACAGTGCTGATCCA                                                                                                                           |                           |
|                     | <i>AT2G39960</i> -R                      | CCATTGGGTGACACTTTTGGT                                                                                                                          |                           |
|                     | ChIP-qPCR                                | <i>RTFL18</i> -P1-F                                                                                                                            | ATCAAGGAGACAAGATACACAAGGT |
|                     |                                          | <i>RTFL18</i> -P1-R                                                                                                                            | TCATGTTCCCTCGTTTTCCAATCC  |
| <i>RTFL18</i> -P2-F |                                          | CTACCAAATTAACAATTCTGCTTT                                                                                                                       |                           |
| <i>RTFL18</i> -P2-R |                                          | CTTCATATACTTCCCAATCTTCTA                                                                                                                       |                           |
| <i>RTFL21</i> -P1-F |                                          | ATCCCATTAAGATTACTTTCACCCTTTG                                                                                                                   |                           |
| <i>RTFL21</i> -P1-R |                                          | GACATAAAAAAACCCAGTGATATGAT                                                                                                                     |                           |
| <i>RTFL21</i> -P2-F |                                          | CAACATCTCTATGTGCTAAGGCATC                                                                                                                      |                           |
| <i>RTFL21</i> -P2-R |                                          | CTTTTGCTCTTCAAGTATCCTCC                                                                                                                        |                           |
| Genotyping          | Dvl-LP2                                  | GATGCTTCATAAAACAGAACTAATC                                                                                                                      |                           |
|                     | Dvl-RP                                   | TTTCAAGCTTTCAAATAACCCGT                                                                                                                        |                           |
|                     | pSKI015-1F                               | ACCTCCTCGGATTCCATTGCCAGCT                                                                                                                      |                           |
|                     | <i>rtfl18</i> -id-F                      | CCTCAAGCATTGTTATATATCAAACGGG                                                                                                                   |                           |
|                     | <i>rtfl18</i> -id-R                      | GGTTGAGGCCATTATATATACAATTCCG                                                                                                                   |                           |
|                     | <i>rtfl21</i> -id-F                      | CTCTCTCAATTTCTCTCTGCCACTC                                                                                                                      |                           |
|                     | <i>rtfl21</i> -id-R                      | ACATGATATGAATGGTTGGAAGCCC                                                                                                                      |                           |
|                     | <i>bsk3-1</i> -LP                        | CTCACTCCGTAGCTGACCAAC                                                                                                                          |                           |
|                     | <i>bsk3-1</i> -RP                        | ACGTTTCATGTCGATTCCCTTTG                                                                                                                        |                           |
|                     | <i>bsk6</i> -LP                          | ATTGTATCAGAACACGGCGAG                                                                                                                          |                           |
|                     | <i>bsk6</i> -RP                          | TTCCAACAACATCCAGCAGG                                                                                                                           |                           |
|                     | LBb1.3                                   | ATTTTGCCGATTTCCGGAAC                                                                                                                           |                           |
| Flag-RTFL18-F       | Flag-RTFL18-F                            | ggggatcctctagagtcgacATGGACTACAAGGACGACGATGACAAGCA<br>TGAGGATTACAAAGACGATGACGATAAGCAAGGTGACTACAAA<br>GACGATGATGACAAACAAGGTGAAATGAAGAGGGTCATGATG |                           |
|                     | Flag-RTFL18-R                            | gaacgaaagctcgaactagtTCAATCATGCGAACAAAGGAGC                                                                                                     |                           |
|                     | RTFL17-Flag-F                            | GGCGGATCCATGAAGATGGGAGGTTCAAAG                                                                                                                 |                           |
|                     | RTFL17-Flag-R                            | ACGCGTCGACTCAATCGTGCCAACAAAG                                                                                                                   |                           |
|                     | RTFL18-Flag-F                            | GGCGGATCCATGGAAATGAAGAGGGTCAT                                                                                                                  |                           |
|                     | RTFL18-Flag-R                            | ACGCGTCGACTCAATCATGCGAACAAAGG                                                                                                                  |                           |
|                     | BSK3-Flag-F                              | ggacgagctcgggtaccATGGGAGGTCAATGCTCTAGC                                                                                                         |                           |
|                     | BSK3-Flag-R                              | tggtcgactctagaggatccCTTCACTCGGGGAACCTCCATTC                                                                                                    |                           |
| BSK6-Flag-F         | gacgagctcgggtaccATGGGAGCTCGTTGCTCAAAGTTC |                                                                                                                                                |                           |

|             |                 |                                              |
|-------------|-----------------|----------------------------------------------|
| For cloning | BSK6-Flag-R     | tggtcgactctagaggatccGCGCTTGTTACTCTTCTTAGCTTC |
|             | GST-RTFL18-F    | cgcgtagatccccggaattcATGGAAATGAAGAGGGTCAT     |
|             | GST-RTFL18-R    | atgcggccgctcgagtcgacTCAATCATGCGAACAAAGGAG    |
|             | 18-cLuc-F       | gtccccggggcggtaccATGGAAATGAAGAGGGTCATGA      |
|             | 18-cLuc-R       | cgaaagctctgcaggtcgacTCAATCATGCGAACAAAGGAGC   |
|             | GFP-RTFL18-F    | gacgagctgtacaagATGGAAATGAAGAGGGTCATGA        |
|             | GFP-RTFL18-R    | cctcttcattccatCTTGTACAGCTCGTCCATGCCG         |
|             | Pro18-F         | ggggaattgggtaccGTGAAACTAATCGCAACGGTGA        |
|             | Pro18-R         | gctctagaactagtggatccTTTCAAGCTTTCAATAACCCG    |
|             | pSUMO-His-18-F5 | agattggtggatccgaattcCACCACCACCACCACCATGG     |
|             | pSUMO-His-18-R5 | tggtggtggtggtgctcgagTCAATCATGCGAACAAAGGAGC   |
|             | BSK3-GST-F      | cgcgtagatccccggaattcATGGGAGGTCAATGCTCTAGC    |
|             | BSK3-GST-R      | atgcggccgctcgagtcgacTACTTCACTCGGGGAECTCC     |
|             | BSK6-GST-F      | cgcgtagatccccggaattcATGGGAGCTCGTTGCTCAA      |
|             | BSK6-GST-R      | atgcggccgctcgagtcgacTCAGCGCTTGTTACTCTTCT     |
|             | BSK3-cYFP-F     | gtaccggggatcctctagaATGGGAGGTCAATGCTCTAGCC    |
|             | BSK3-cYFP-R     | acgctgccaccgccgctcgacCTTCACTCGGGGAECTCCATT   |
|             | BSK6-cYFP-F     | gtaccggggatcctctagaATGGGAGCTCGTTGCTCAAAGT    |
|             | BSK6-cYFP-R     | acgctgccaccgccgctcgacGCGCTTGTTACTCTTCTTAGCT  |
|             | nYFP-RTFL18-F   | acgccggcggtcctctagaGAAATGAAGAGGGTCATGATGA    |
|             | nYFP-RTFL18-R   | cgaaagctctgcaggtcgacTCAATCATGCGAACAAAGGAGC   |
|             | BSK3-P2302-F    | agctcggtagccggggatccATGGGAGGTCAATGCTCTAGC    |
|             | BSK3-P2302-R    | ctcaccatactagtgtcgacCTTCACTCGGGGAECTCCATT    |
|             | BSK6-P2302-F    | agctcggtagccggggatccATGGGAGCTCGTTGCTCAAAGT   |
|             | BSK6-P2302-R    | ctcaccatactagtgtcgacGCGCTTGTTACTCTTCTTAGCT   |
